# Supplementary material for: Genomic Structure and Evolution of Multigene Families: “Flowers” on the Human Genome
Source: PubMed Central journal article supplement (PMC3388347; doi:10.1155/2012/917678), 2012-06-19

## **Supplemental Material**

**Table S1. List of the 291 Flowers identified in the present study.**

**Table S2. List of genes contained in Flowers.**

**Table S3. List of GO id of genes contained in Flowers.**

\*The above three supplemental tables were separated Excel files.

**Figure S1. Distribution of Flower length**

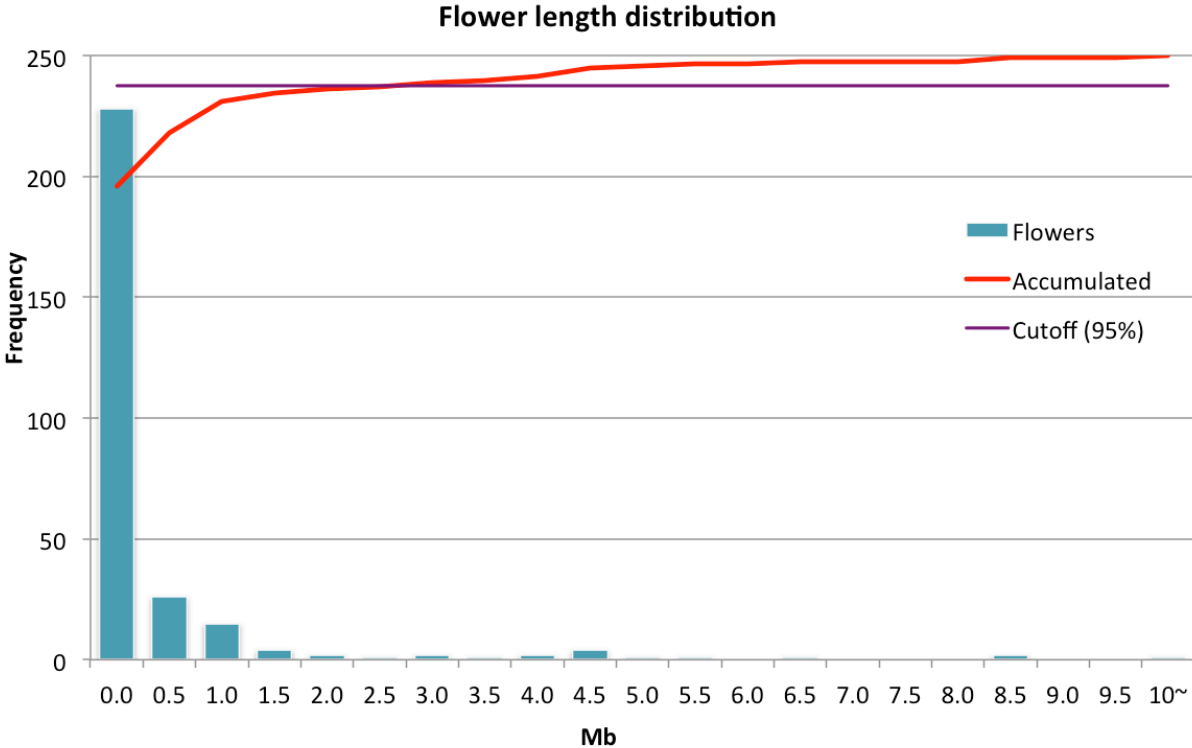

## Figure S2. Dot-plot of the largest Flower

The Flower is located on chromosome 15, 72.1-83.8 Mb. A line in the figure indicates a BLAST analysis 'hit' and the colors of the lines show the percent identities (see key on the right side). At the top and right of the dot-plot, a pink arrow indicates loci and length of genes. The blue arrow indicates loci in a region that shows up as a recurrent microdeletion.

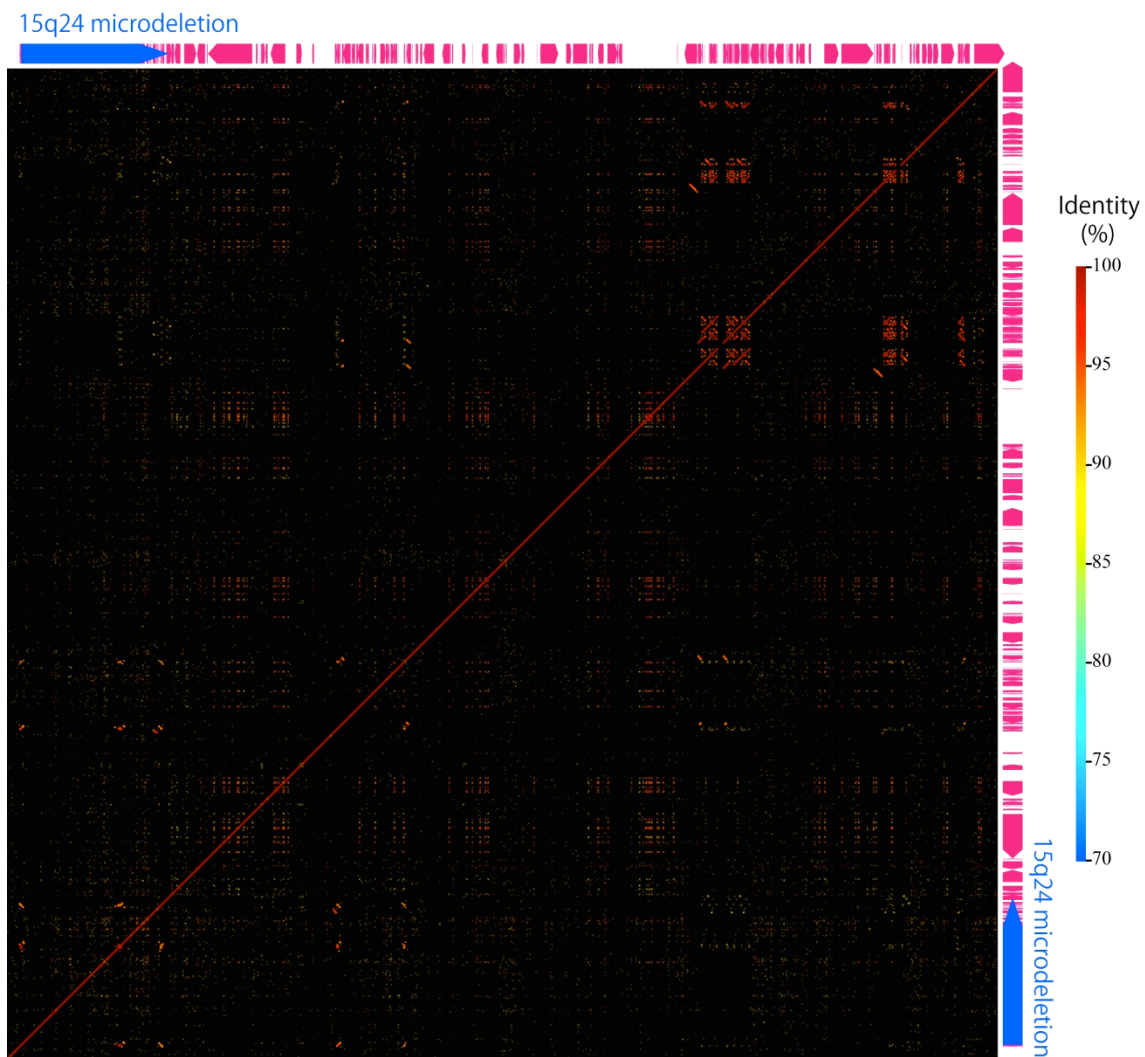

**Figure S3. Distribution of maximum and minimum identity**

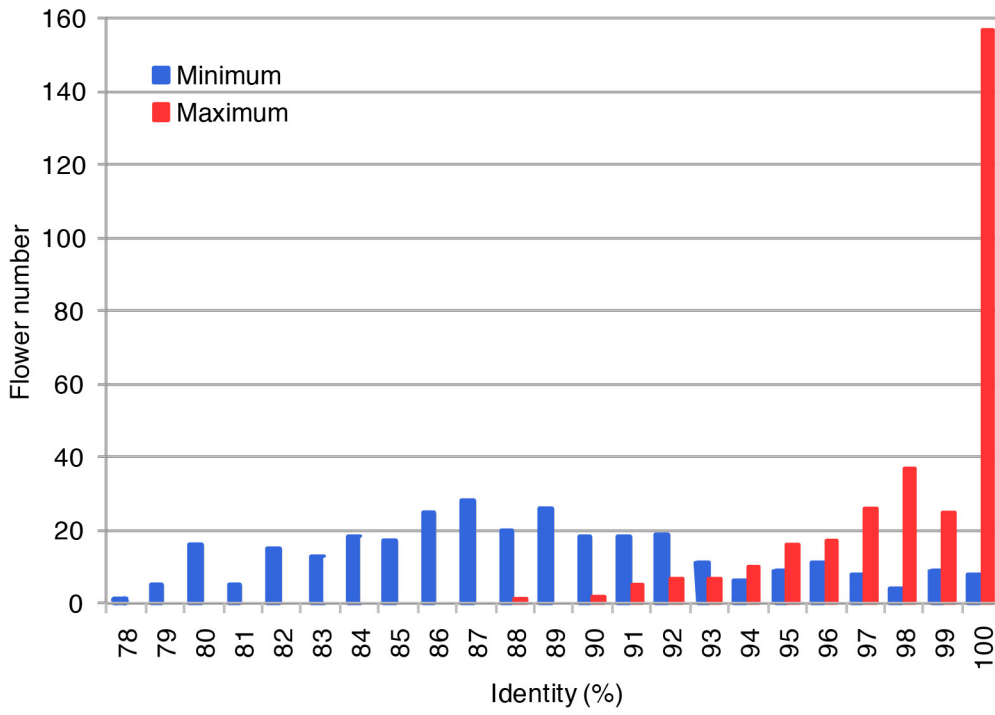

**Figure S4. The number of BLAST hits, categorized by percent identity.**

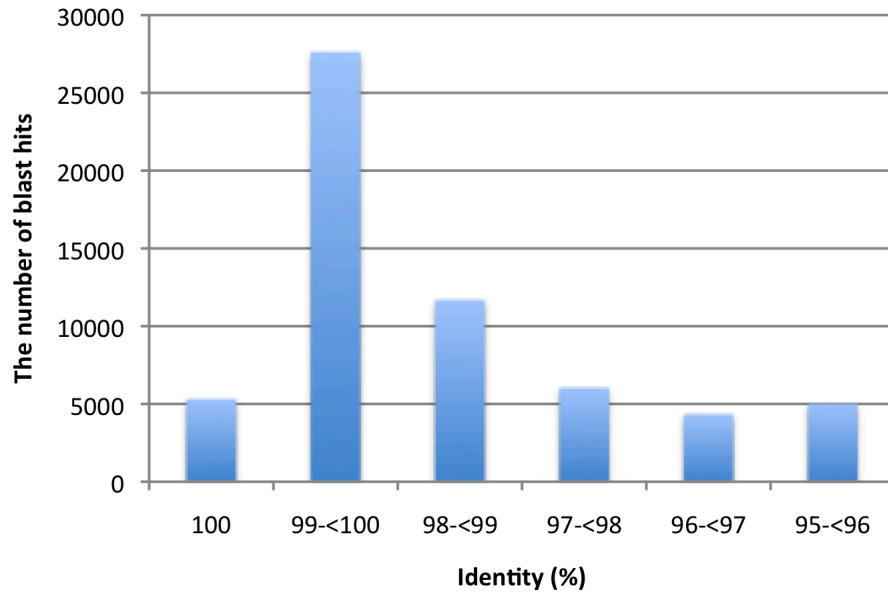

Supplement: 917678.f1.pdf [file 917678.f1.pdf]
